# Supplementary material
Source: PubMed Central journal article supplement (PMC7808550)
Supplement: NIHMS1653376-supplement-Online_Supplement.pdf [file NIHMS1653376-supplement-Online_Supplement.pdf]

**Renovascular disease induces senescence in renal scattered tubular-like cells  
and impairs their reparative potency**

Xiao-Jun Chen<sup>1,3</sup>, Seo Rin Kim<sup>1,4</sup>, Kai Jiang<sup>1</sup>, Christopher M. Ferguson<sup>1</sup>, Hui Tang<sup>1</sup>,  
XiangYang Zhu<sup>1</sup>, Amir Lerman<sup>2</sup>, Alfonso Eirin<sup>1</sup>, Lilach O. Lerman<sup>1</sup>.

**Affiliation:**

<sup>1</sup>Division of Nephrology and Hypertension, <sup>2</sup>Department of Cardiovascular Diseases,  
Mayo Clinic, Rochester, MN, USA,

<sup>3</sup>Department of Nephrology, The Second Xiangya Hospital of Central-South University,  
Changsha, Hunan, China.

<sup>4</sup>Division of Nephrology, Pusan National University Yangsan Hospital, Yangsan, Korea.

**Correspondence:**

Lilach O. Lerman, MD, PhD, Division of Nephrology and Hypertension, Mayo Clinic, 200  
First Street SW, Rochester, MN 55905.

Fax:(507)-266-9316 Phone:(507)-266-9376 Email:[lerman.lilach@mayo.edu](mailto:lerman.lilach@mayo.edu)

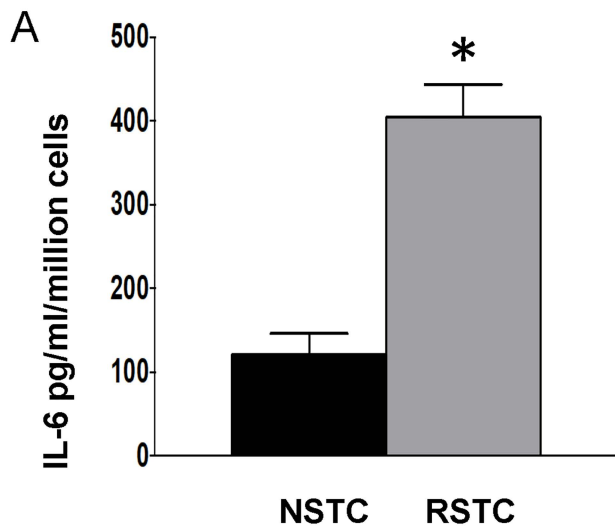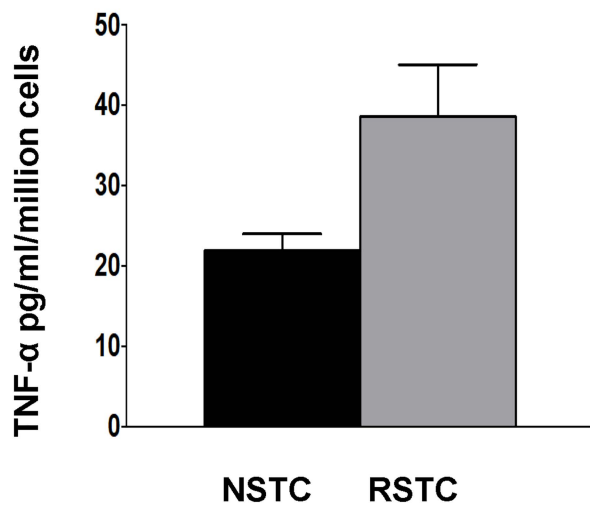

**B**

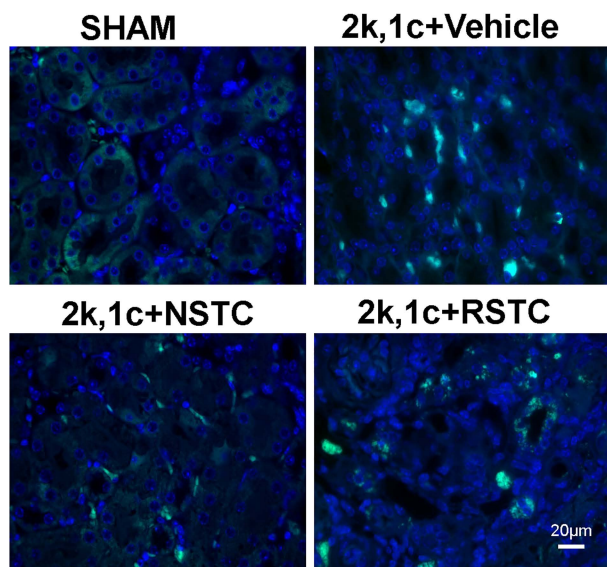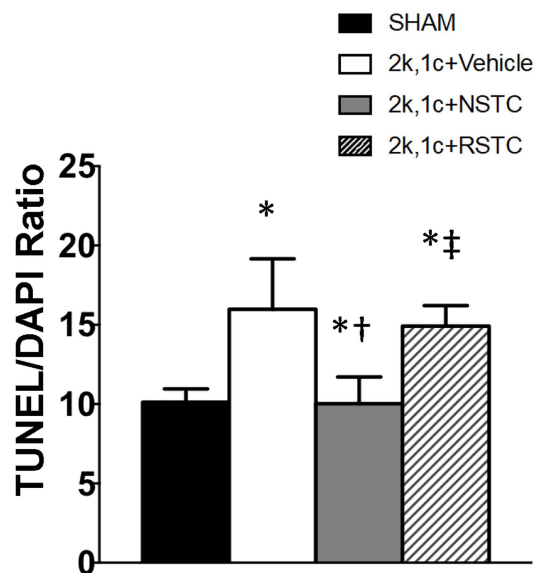

Supplementary Fig.S1. A, Levels of IL-6 and TNF- $\alpha$  (pg/ml/million) in conditioned medium of renal scattered tubular-like cells (STC) from Normal and RVD pigs. Mean $\pm$ SD; Normal n=3, RVD n=3; \*p<0.05 vs. Normal. B, C, Plasma creatinine level and volumes of STK/CLK (Mean $\pm$ SD) in sham mice, 2k,1c+Vehicle (V, n=6), 2k,1c+normal STC (NSTC, n=8), and 2k,1c+ RVD-STC (RSTC, n=8) groups. \*p<0.05 vs Sham. D, TUNEL staining and quantification of apoptosis. Mean $\pm$ SD; \*p<0.05 vs Sham, †p<0.05 vs 2k,1c+Vehicle, ‡p<0.05 vs 2k,1c+NSTC.
